# Supplementary material
Source: HighWire-hosted journal article supplement (https://www.cmaj.ca/content/suppl/2021/02/04/193.6.E215)
Supplement: 201564-five-1-at.pdf [file 201564-five-1-at.pdf]

## Appendix 1 (as submitted by the authors): Supplementary table

| Examples of Prescribing Cascades                         |                                                              |                                                 |
|----------------------------------------------------------|--------------------------------------------------------------|-------------------------------------------------|
| Initial Medication Prescribed (class and example)        | Adverse Drug Event Misinterpreted as a New Medical Condition | New Drug Therapy Prescribed (class and example) |
| Ace inhibitor – enalapril <sup>1</sup>                   | Cough                                                        | Antibiotic - levofloxacin                       |
| Thiazide diuretic – hydrochlorothiazide <sup>2</sup>     | Hyperuricemia, gout                                          | Antigout - colchicine                           |
| Antinausea- metoclopramide <sup>3</sup>                  | Parkinsonism                                                 | Antiparkinsonian- carbidopa/levodopa            |
| Cholinesterase inhibitor – donepezil <sup>4</sup>        | Urinary incontinence                                         | Urinary anticholinergic - solifenacin           |
| Non-steroidal anti-inflammatory – ibuprofen <sup>5</sup> | Hypertension                                                 | Antihypertensive - amlodipine                   |
| Calcium channel blocker – amlodipine <sup>6</sup>        | Ankle edema                                                  | Diuretic - furosemide                           |

## References

1. Vegter S, de Jong-van den Berg LT. Misdiagnosis and mistreatment of a common side-effect- angiotensin-converting enzyme inhibitor-induced cough. *Br J Clin Pharmacol* 2010;69(2):200-3.
2. Gurwitz JH, Kalish SC, Bohn RL, et al. Thiazide diuretics and the initiation of anti-gout therapy. *J Clin Epidemiol* 1997;50(8):953-9.
3. Avorn J, Gurwitz JH, Bohn RL, et al. Increased incidence of levodopa therapy following metoclopramide use. *JAMA* 1995;274(22):1780-2.
4. Gill SS, Mamdani M, Naglie G, et al. A prescribing cascade involving cholinesterase inhibitors and anticholinergic drugs. *Archives of Internal Medicine* 2005;165(7):808-13.
5. Gurwitz JH, Avorn J, Bohn RL, et al. Initiation of antihypertensive treatment during nonsteroidal anti-inflammatory drug therapy. *JAMA* 1994;272(10):781-6.
6. Savage RD, Visentin JD, Bronskill SE et al. Evaluation of a common prescribing cascade of calcium channel blockers and diuretics in older adults with hypertension. *JAMA Intern Med* 2020;180(5):643-651
